# Supplementary material for: Genetic analysis and elite tree selection of the main resin components of slash pine
Source: Front Plant Sci. 2023 Feb 1;14:1079952. doi: 10.3389/fpls.2023.1079952 (PMC9930156; doi:10.3389/fpls.2023.1079952)
Supplement: Table S1 — Sample information. [file Table_1.xlsx]

## Sheet: Sheet1
	α pinene	β pinene	abietic acid	levopimaric acid
α pinene	1	-0.89 (0.03)	-0.68 (0.04)	-0.77 (0.02)
β pinene	-0.67 (0.01)	1	0.67 (0.02)	0.71 (0.02)
abietic acid	-0.66 (0.11)	0.62 (0.13)	1	0.84 (0.01)
levopimaric acid	-0.67 (0.11)	0.67 (0.11)	0.67 (0.01)	1
