# Supplementary material for: Genetic analysis and elite tree selection of the main resin components of slash pine
Source: Front Plant Sci. 2023 Feb 1;14:1079952. doi: 10.3389/fpls.2023.1079952 (PMC9930156; doi:10.3389/fpls.2023.1079952)
Supplement: Table S2 — Resin components of 240 accessions of Pinus elliottii. [file Table_2.xlsx]

## Sheet: 10 monoterpene
accession	3-Carene/%	accession	α-Pinene/%	accession	α-Thujene/%	accession	β-Myrcene/%	accession	β-Phellandrene/%	accession	β-Pinene/%	accession	Camphene/%	accession	Limonene/%	accession	ρ-Allylanisole/%	accession	Terpinolene/%
T10	0.0109	T01	17.873	T01	0.0104	T01	0.0706	T01	0.3164	T01	7.48676	T01	0.1096	T01	0.0987	T10	0.162	T01	0.0073
T100	0.0083	T02	17.3384	T10	0.1195	T100	0.0635	T101	0.1878	T02	6.08336	T10	0.0933	T10	0.0661	T100	0.0667	T101	0.0072
T106	0.0062	T04	17.3501	T100	0.3725	T101	0.0706	T102	0.7945	T04	10.8687	T134	0.0903	T100	0.0771	T101	0.0491	T102	0.0085
T112	0.0073	T08	22.5407	T101	0.0049	T102	0.0885	T103	1.0528	T08	7.88673	T135	0.0769	T115	0.0609	T102	0.7474	T104	0.0058
T114	0.007	T100	21.8236	T104	0.0109	T103	0.0848	T104	0.6178	T100	7.26132	T25	0.0832	T116	0.0952	T103	0.3582	T105	0.0109
T115	0.0052	T101	21.2186	T110	0.2651	T104	0.071	T105	0.3226	T101	5.07475	T26	0.1009	T117	0.1015	T104	0.0271	T108	0.0121
T120	0.0087	T104	21.4521	T113	0.0066	T105	0.0955	T106	0.3912	T104	7.35009	T27	0.0712	T118	0.059	T126	0.2916	T111	0.0083
T128	0.0064	T106	19.7988	T114	0.4429	T108	0.1439	T107	0.2496	T106	6.144	T28	0.0916	T119	0.0933	T127	0.5468	T115	0.0052
T131	0.004	T112	17.2343	T117	0.0087	T11	0.0392	T108	1.0751	T112	15.7734	T29	0.0904	T12	0.0391	T128	0.3842	T116	0.0066
T132	0.0062	T116	20.8364	T119	0.0129	T112	0.0785	T109	0.3055	T116	5.48715	T3	0.0619	T14	0.0321	T129	0.0178	T124	0.006
T144	0.0116	T120	21.3486	T120	0.0534	T113	0.0509	T11	0.0826	T120	5.16549	T30	0.0917	T140	0.0585	T13	0.1077	T125	0.006
T146	0.01	T121	18.4398	T123	0.1081	T115	0.0459	T111	0.9882	T121	6.85936	T31	0.0978	T141	0.0754	T131	0.0392	T126	0.0068
T149	0.0062	T124	16.944	T124	0.0067	T118	0.0497	T112	0.2369	T124	30.3372	T32	0.062	T142	0.0757	T132	0.0279	T127	0.0103
T150	0.007	T126	21.1228	T125	0.0067	T119	0.0754	T113	0.3331	T126	9.54382	T33	0.0963	T143	0.0762	T135	0.0067	T129	0.0067
T19	0.0148	T127	21.9733	T127	0.0125	T121	0.0517	T114	0.0713	T127	5.13239	T34	0.0898	T144	0.1283	T137	0.1425	T13	0.0075
T24	0.0061	T128	20.1066	T128	0.9756	T122	0.0741	T115	0.6898	T128	7.82894	T35	0.0941	T145	0.0705	T139	0.0472	T136	0.0078
T27	0.0103	T13	22.6485	T129	0.011	T124	0.0828	T116	0.5318	T13	10.084	T36	0.0828	T146	0.0883	T20	0.165	T143	0.0054
T28	0.0065	T131	18.5088	T134	0.2166	T125	0.0828	T117	0.3926	T131	5.88758	T37	0.0988	T147	0.0761	T22	0.1946	T146	0.0075
T32	0.0039	T133	16.1233	T135	0.013	T128	0.0716	T118	0.0748	T133	4.88052	T38	0.0864	T40	0.0829	T23	0.1214	T148	0.0073
T35	0.004	T134	21.8083	T137	0.765	T13	0.062	T119	0.9868	T134	10.3098	T39	0.0605	T41	0.0829	T24	0.0157	T150	0.0055
T43	0.0047	T140	18.9117	T139	0.01	T130	0.0356	T12	0.0339	T140	7.94521	T4	0.0476	T42	0.0751	T25	0.0502	T16	0.0103
T44	0.006	T142	17.8295	T141	0.0672	T132	0.0427	T120	0.2789	T142	5.01866	T40	0.0707	T43	0.0649	T26	0.0116	T18	0.0061
T54	0.0052	T146	19.0992	T142	0.0073	T136	0.0726	T121	0.2638	T146	5.29457	T41	0.0813	T44	0.0793	T27	0.0192	T2	0.008
T55	0.0139	T15	19.4565	T143	0.0643	T137	0.1461	T122	0.1234	T15	6.74862	T42	0.0888	T45	0.0608	T4	0.1196	T20	0.0069
T57	0.0046	T151	16.5417	T146	0.3273	T139	0.0623	T123	0.6012	T151	5.64386	T43	0.0925	T46	0.0714	T40	0.0151	T31	0.0064
T6	0.0058	T152	19.2706	T147	0.0112	T14	0.0225	T124	0.2096	T152	6.29127	T44	0.0784	T47	0.0715	T41	0.2269	T33	0.0062
T60	0.0079	T154	20.9253	T148	0.009	T144	0.1003	T125	0.2096	T154	4.12036	T45	0.0775	T48	0.0607	T42	0.1928	T34	0.0058
T62	0.0232	T158	19.7166	T15	0.0315	T145	0.0438	T126	0.5558	T158	7.95696	T46	0.1024	T49	0.0694	T43	0.1548	T37	0.0096
T67	0.0206	T159	18.3729	T16	0.0798	T146	0.0785	T127	1.0026	T159	5.19718	T47	0.0772	T5	0.0777	T44	0.0788	T41	0.0059
T79	0.0078	T160	20.0127	T2	0.0114	T147	0.0535	T129	0.8869	T160	4.33313	T48	0.0813	T50	0.0834	T45	0.1681	T46	0.0052
T80	0.0084	T162	19.812	T24	0.0089	T148	0.074	T13	0.6525	T162	4.3297	T5	0.0738	T51	0.0733	T46	0.4721	T50	0.0087
T85	0.007	T163	23.2758	T28	0.0115	T149	1.9631	T130	0.0679	T163	4.17637	T50	0.0665	T52	0.0767	T47	0.002	T53	0.0087
T87	0.0132	T164	6.4598	T30	0.1305	T19	0.034	T131	0.0531	T164	7.88313	T51	0.0809	T53	0.0723	T48	0.157	T54	0.0057
T88	0.0102	T167	22.7111	T31	0.007	T20	0.0673	T132	0.0779	T167	4.57476	T52	0.0908	T54	0.0781	T49	0.0073	T56	0.0101
T9	0.0058	T168	20.9743	T34	0.0606	T21	0.0236	T135	0.6486	T168	4.13969	T53	0.1033	T55	0.0874	T5	0.0197	T57	0.0056
T96	0.0076	T17	18.2535	T35	0.1861	T27	0.0268	T138	0.4259	T17	6.85407	T54	0.0856	T56	0.0534	T50	0.2634	T58	0.0092
T98	0.0057	T173	21.8189	T36	0.0372	T30	0.0654	T139	0.7175	T173	6.13528	T55	0.084	T58	0.106	T51	0.0646	T6	0.0059
T300	4.9193	T177	19.9804	T37	0.0724	T33	0.0675	T14	0.1745	T177	4.14111	T56	0.0715	T59	0.1034	T52	0.1775	T60	0.0076
T301	4.9507	T18	16.422	T39	0.2874	T35	0.0492	T141	0.3926	T18	5.39807	T57	0.085	T6	0.079	T53	0.0217	T61	0.005
T302	4.6484	T181	15.1142	T4	0.03	T38	0.053	T142	0.3309	T181	6.15776	T58	0.0794	T60	0.0926	T54	0.0189	T63	0.005
T303	4.6439	T188	17.5444	T41	0.2058	T40	0.0658	T143	0.4054	T188	7.20695	T60	0.0767	T61	0.0721	T55	0.229	T64	0.0074
T304	4.8583	T227	20.9572	T45	0.0471	T42	0.0569	T144	1.752	T227	6.09746	T61	0.0841	T62	0.0972	T56	0.0429	T65	0.0087
T305	5.229	T23	17.2071	T46	0.0047	T43	0.0517	T145	0.6631	T23	8.35818	T62	0.0847	T63	0.0798	T57	0.4128	T67	0.0099
T306	4.5231	T230	17.4013	T48	0.1336	T46	0.0579	T147	1.0359	T230	5.05992	T63	0.0909	T64	0.0766	T58	0.0811	T68	0.0084
T307	4.659	T260	19.7866	T50	0.4637	T47	0.052	T148	0.9163	T260	6.58431	T64	0.076	T65	0.079	T59	0.0973	T7	0.0062
T308	3.352	T33	18.6201	T51	0.219	T48	0.0546	T149	0.3891	T33	6.54172	T65	0.1162	T66	0.0854	T6	0.2515	T71	0.0098
T309	5.5274	T34	17.9827	T52	0.0065	T50	0.0688	T15	0.1443	T34	5.26556	T66	0.0819	T67	0.0695	T60	0.1707	T73	0.0093
T310	4.5475	T35	20.1578	T53	0.0558	T51	0.0517	T150	0.2979	T35	6.51587	T67	0.0756	T68	0.0645	T61	0.1382	T74	0.0116
T311	4.8464	T36	18.8633	T54	0.0052	T52	0.0603	T17	0.1458	T36	5.99544	T68	0.0686	T69	0.066	T62	0.3971	T76	0.0085
T312	4.8028	T42	19.6045	T57	0.3103	T55	0.0653	T18	0.0779	T42	6.91166	T69	0.0591	T7	0.0824	T63	0.0046	T78	0.0121
T313	4.9891	T44	19.8746	T58	1.6926	T57	0.0665	T19	0.0644	T44	7.346	T7	0.0988	T70	0.0728	T64	0.0679	T80	0.0066
T314	4.7238	T47	21.6925	T59	1.2448	T60	0.0791	T2	0.6536	T47	11.5416	T71	0.0895	T71	0.1197	T65	0.1215	T81	0.0089
T315	3.1144	T51	16.0736	T6	0.008	T62	0.0709	T20	0.6928	T51	10.0909	T72	0.0723	T72	0.1058	T66	0.3055	T89	0.0091
T316	3.8031	T53	20.2888	T61	0.0633	T63	0.0681	T21	0.0432	T53	6.82522	T74	0.114	T73	0.1097	T71	0.1966	T90	0.0051
T317	4.6235	T54	20.2888	T62	1.3948	T67	0.0539	T22	0.6267	T54	6.82522	T75	0.1015	T74	0.1273	T72	0.0296	T91	0.0068
T318	4.3508	T55	18.2563	T66	0.4328	T7	0.0748	T24	0.2869	T55	6.64155	T76	0.0792	T75	0.0939	T73	0.0592	T97	0.0104
T320	3.1628	T56	20.5091	T68	0.7014	T70	0.0587	T25	0.1118	T56	6.03367	T77	0.0954	T76	0.0914	T74	0.1393	T99	0.0061
T321	4.3978	T59	19.5763	T71	0.0232	T74	0.0982	T26	0.2067	T59	7.50919	T78	0.1205	T77	0.0679	T75	0.0499
T322	4.4899	T62	19.2164	T73	0.0972	T76	0.0676	T27	0.2581	T62	7.47164	T79	0.0995	T78	0.1438	T76	0.6175
T323	5.7555	T63	19.3382	T75	0.7105	T77	0.0584	T28	0.2593	T63	8.90086	T8	0.0832	T79	0.089	T77	0.0835
T324	3.8902	T66	17.2738	T76	0.6236	T8	0.0486	T29	0.0945	T66	4.7103	T80	0.1125	T8	0.0635	T78	0.2364
T325	3.1305	T67	18.19	T78	0.0127	T81	0.079	T3	0.399	T67	5.26116	T81	0.0789	T80	0.0926	T79	0.0645
T326	4.1304	T68	18.7158	T79	0.0103	T83	0.1131	T31	0.6158	T68	8.75116	T82	0.0666	T81	0.0948	T8	0.2959
T327	4.5594	T72	19.3852	T8	0.5777	T85	0.0678	T32	0.3059	T72	9.68877	T83	0.1122	T82	0.0773	T80	0.0342
T328	4.0251	T74	18.3349	T82	1.357	T86	0.0714	T33	0.6745	T74	6.24534	T84	0.0905	T83	0.1336	T81	0.3852
T330	4.7936	T76	18.8497	T83	1.3867	T90	0.0607	T34	0.6171	T76	4.92673	T85	0.1064	T84	0.0961	T82	0.0023
T331	4.3762	T77	24.1172	T84	0.0733	T92	0.0737	T36	0.0889	T77	16.4794	T86	0.091	T85	0.0811	T83	0.0536
T332	4.2928	T78	17.0143	T86	0.1409	T93	0.0549	T38	0.2661	T78	7.91157	T87	0.077	T86	0.0871	T84	0.2732
T333	4.77	T79	18.7301	T87	0.37	T94	0.0631	T40	0.1512	T79	4.82667	T88	0.1273	T87	0.0736	T85	0.1701
T334	4.0617	T81	13.0432	T88	0.0889	T95	0.053	T41	0.0573	T81	7.27476	T89	0.0987	T88	0.1167	T88	0.177
T335	4.1997	T82	18.5846	T9	0.1106	T98	0.0705	T42	0.4514	T82	6.97841	T9	0.0634	T89	0.1147	T89	0.0003
T336	4.4507	T83	17.0917	T90	0.5992	T99	0.0554	T43	0.1314	T83	35.906	T90	0.0707	T09	0.0486	T9	0.1232
T337	4.7349	T84	18.7684	T92	0.1364	T308	0.0829	T44	1.1644	T84	7.0736	T91	0.0612	T91	0.0676	T90	0.0013
T338	3.9982	T85	19.1289	T97	0.0131	T302	0.0751	T45	0.1201	T85	5.2488	T92	0.0945	T92	0.073	T91	0.406
T339	4.4408	T86	22.2154	T98	0.0096	T309	0.0639	T47	0.7049	T86	11.522	T93	0.0611	T93	0.0789	T95	0.0414
T340	3.6141	T87	17.4733	T99	0.3966	T306	0.0791	T49	0.2621	T87	6.09306	T94	0.0585	T94	0.0729	T96	0.216
T341	3.2791	T91	18.9295			T301	0.0782	T5	0.3474	T91	7.33766	T96	0.1014	T95	0.071	T97	0.1598
T342	4.4501	T93	22.3738			T303	0.0691	T52	0.351	T93	6.46573	T97	0.0832	T96	0.0797	T98	0.2184
T343	5.1233	T97	17.4875			T310	0.0762	T53	0.0823	T97	5.09594	T98	0.0922	T97	0.0955	T99	0.2476
T344	3.1106	T98	18.1471			T312	0.0663	T54	0.1631	T98	8.84749	T99	0.0888	T98	0.0935	T308	0.3055
T346	4.1574	T99	19.2183			T304	0.0835	T55	0.8999	T99	6.81562	T308	0.1267	T99	0.0697	T302	0.0808
T347	4.0652	T308	15.3977			T305	0.0652	T56	0.1091	T308	11.9265	T302	0.1104	T308	0.1125	T309	0.1562
T348	4.6424	T302	16.4356			T311	0.0721	T6	0.3995	T302	14.6215	T309	0.0993	T302	0.0927	T306	0.084
T349	3.78	T309	15.2836			T307	0.0794	T60	1.1778	T309	9.37965	T306	0.1049	T309	0.088	T301	0.1212
T350	5.8642	T306	14.9989			T316	0.058	T61	0.1437	T306	13.5094	T301	0.0912	T306	0.1003	T303	0.2047
T351	4.4531	T301	15.3882			T315	0.0651	T62	0.0181	T301	11.942	T303	0.1135	T301	0.0838	T310	0.1607
T352	3.8998	T303	10.4638			T317	0.0583	T63	0.3364	T303	15.2309	T310	0.0991	T303	0.0894	T312	0.1297
T353	4.8723	T310	13.2148			T314	0.059	T64	0.4392	T310	14.4428	T312	0.0881	T310	0.0953	T304	0.1799
T354	4.7939	T312	10.2677			T313	0.0651	T65	0.1004	T312	16.6287	T304	0.0858	T312	0.0823	T305	0.2423
T355	4.5092	T304	15.0792			T318	0.0719	T67	0.0936	T304	10.5959	T305	0.0943	T304	0.1286	T311	0.1062
T356	4.7619	T305	13.6599			T328	0.0722	T69	0.4746	T305	13.1553	T311	0.1102	T305	0.0788	T307	0.0796
T357	4.9805	T311	16.6939			T323	0.0723	T7	0.264	T311	6.07815	T307	0.1058	T311	0.1168	T316	0.1502
T358	4.2262	T307	15.3977			T326	0.0947	T70	0.5714	T307	11.9265	T316	0.1073	T307	0.1034	T315	0.1573
T359	4.8607	T316	13.1903			T350	0.0516	T71	1.4697	T316	9.132	T315	0.084	T316	0.0958	T317	0.2281
T360	4.5194	T315	15.0416			T320	0.0608	T72	0.3744	T315	11.8788	T317	0.1052	T315	0.0839	T314	0.1069
T361	5.1533	T317	13.6735			T321	0.0641	T73	0.2931	T317	12.3547	T314	0.0708	T317	0.1002	T313	0.1163
T362	4.4825	T314	9.389			T324	0.0844	T74	1.4691	T314	12.3616	T313	0.0851	T314	0.1037	T318	0.046
T363	3.6726	T313	16.8471			T342	0.1033	T77	0.3725	T313	8.7009	T318	0.1011	T313	0.1011	T328	0.1659
T364	3.9614	T318	13.1023			T343	0.082	T78	0.3452	T318	12.6823	T328	0.073	T318	0.0965	T323	0.1378
T365	4.176	T328	11.6117			T338	0.0764	T80	0.4222	T328	14.5474	T323	0.1175	T328	0.0655	T326	0.0552
T366	5.0084	T323	13.5926			T334	0.0723	T81	0.7554	T323	10.2878	T326	0.0691	T323	0.1059	T350	0.1555
T367	4.1853	T326	11.5859			T336	0.0771	T84	1.1169	T326	15.9137	T350	0.101	T326	0.1032	T320	0.1747
T368	5.3195	T350	8.0004			T341	0.0924	T85	0.5899	T350	12.1179	T320	0.1095	T350	0.1018	T321	0.1933
T369	5.5151	T320	13.3741			T331	0.0677	T88	1.0069	T320	14.5692	T321	0.1217	T320	0.1118	T324	0.0935
T370	4.9221	T321	13.7045			T340	0.0595	T89	0.6151	T321	11.4057	T324	0.0878	T321	0.0882	T342	0.1842
T371	4.5406	T324	8.4209			T339	0.0837	T9	0.0277	T324	12.3903	T342	0.0689	T324	0.0961	T343	0.1952
T372	4.0434	T342	12.0265			T335	0.0602	T91	0.5082	T342	14.7401	T343	0.1013	T342	0.0633	T347	0.2554
T373	5.0226	T343	13.2236			T332	0.0642	T93	0.3123	T343	10.0894	T347	0.1072	T343	0.1142	T351	0.096
T374	4.122	T347	11.9799			T349	0.0645	T94	0.1845	T347	12.2587	T351	0.0832	T347	0.1132	T346	0.1844
T375	3.3927	T351	14.8887			T300	0.0629	T95	0.651	T351	8.9952	T346	0.063	T351	0.0911	T327	0.1177
T376	4.4731	T346	8.2203			T333	0.0826	T96	0.4189	T346	13.5416	T327	0.0766	T346	0.0719	T348	0.0687
T377	4.8372	T327	15.4744			T325	0.0757	T98	0.5684	T327	8.6676	T348	0.1047	T327	0.0686	T344	0.042
T378	4.4585	T348	14.8242			T322	0.0829	T320	0.7541	T348	9.4263	T344	0.0948	T348	0.1062	T330	0.3207
T379	4.1487	T344	10.2441			T367	0.0897	T321	0.2114	T344	8.26005	T330	0.1091	T344	0.0949	T337	0.2276
T380	3.5494	T330	17.0399			T363	0.0821	T324	0.0656	T330	9.01005	T337	0.0797	T330	0.0955	T338	0.3016
T381	4.7729	T337	13.5641			T353	0.0886	T342	0.2414	T337	17.5184	T338	0.065	T337	0.0951	T334	0.2371
T382	4.3348	T338	13.3095			T364	0.0602	T343	0.0912	T338	10.8798	T334	0.0717	T338	0.0801	T336	0.1511
T384	4.0524	T334	15.5183			T366	0.0816	T347	0.1293	T334	9.02565	T336	0.0842	T334	0.0728	T341	0.1043
T385	2.562	T336	7.7791			T368	0.0616	T351	0.0753	T336	15.4986	T341	0.0857	T336	0.07	T331	0.1002
T386	3.5851	T341	13.1325			T354	0.0761	T346	0.4276	T341	12.8599	T331	0.0747	T341	0.1004	T340	0.138
T387	4.318	T331	13.5198			T352	0.0783	T327	0.114	T331	12.0759	T340	0.0752	T331	0.0879	T339	0.1135
T388	4.6446	T340	8.1384			T355	0.0721	T348	0.0821	T340	15.5981	T339	0.0801	T340	0.0943	T335	0.1101
T389	3.7835	T339	13.5198			T360	0.0771	T344	0.5076	T339	12.0759	T335	0.0716	T339	0.126	T332	0.2505
T390	4.8845	T335	10.3965			T361	0.0855	T330	0.535	T335	12.8064	T332	0.0757	T335	0.0853	T349	0.235
T391	3.4892	T332	13.7687			T365	0.0573	T337	0.0956	T332	9.37395	T349	0.1085	T332	0.065	T300	0.1703
T392	4.4597	T349	8.6752			T357	0.0751	T338	0.2303	T349	10.5711	T300	0.0897	T349	0.1092	T333	0.1246
T393	3.7415	T300	15.1867			T359	0.0774	T334	0.3321	T300	11.3454	T333	0.0984	T300	0.0746	T325	0.2108
T394	5.1277	T333	10.2214			T356	0.056	T336	0.0683	T333	16.6447	T325	0.1085	T333	0.1	T322	0.1384
T395	3.52	T325	9.5373			T358	0.0643	T341	0.0782	T325	12.1116	T322	0.0718	T325	0.105	T367	0.0803
T396	5.0316	T322	15.922			T362	0.0683	T331	0.5755	T322	9.31875	T367	0.0838	T322	0.1173	T363	0.1026
T397	3.6767	T367	10.3705			T378	0.0809	T340	0.3143	T367	11.4706	T363	0.0959	T367	0.0871	T353	0.2367
T398	3.8319	T363	14.8491					T339	0.091	T363	12.8484	T353	0.0889	T363	0.0513	T364	0.0951
T399	3.6098	T353	15.843					T335	0.0834	T353	8.7354	T364	0.111	T353	0.0972	T366	0.1414
T400	4.6648	T364	11.6519					T332	0.0769	T364	18.5783	T366	0.0811	T364	0.1126	T368	0.1335
T401	4.5047	T366	11.9269					T349	0.302	T366	15.0107	T368	0.0978	T366	0.1039	T354	0.3059
T402	2.9905	T368	14.5884					T300	0.2978	T368	14.0617	T354	0.1046	T368	0.0671	T352	0.0708
T403	5.3507	T354	8.071					T333	0.0913	T354	15.0457	T352	0.1083	T354	0.0979	T355	0.2781
T404	4.1543	T352	8.5789					T325	0.0567	T352	18.8409	T355	0.0826	T352	0.0957	T360	0.1713
T405	4.6524	T355	15.5461					T322	1.2243	T355	9.378	T360	0.0829	T355	0.0971	T361	0.1588
T406	4.1998	T360	6.8569					T367	0.8264	T360	18.042	T361	0.0988	T360	0.0711	T365	0.1758
T407	5.3315	T361	16.532					T363	1.2952	T361	11.3442	T365	0.1129	T361	0.0868	T357	0.0889
T408	4.2989	T365	16.4726					T353	0.3506	T365	17.9334	T357	0.1049	T365	0.1061	T359	0.2067
T409	4.1024	T357	8.7862					T364	0.3642	T357	16.0844	T359	0.0791	T357	0.0967	T356	0.1281
T410	4.5707	T359	14.8887					T366	0.0703	T359	8.9952	T356	0.0838	T359	0.1117	T358	0.1693
T411	3.129	T356	8.4303					T368	0.2367	T356	18.2788	T358	0.0923	T356	0.0894	T362	0.1963
T412	4.6993	T358	8.2769					T354	0.1433	T358	16.1988	T362	0.0844	T358	0.0897	T378	0.1198
T413	3.9122	T362	10.478					T352	0.1447	T362	12.6455	T378	0.0872	T362	0.111	T373	0.0512
T414	3.5807	T378	8.7217					T355	0.0904	T378	14.0865	T373	0.1212	T378	0.0715	T377	0.1921
T415	3.8441	T373	16.5397					T360	0.1611	T373	5.8506	T377	0.0983	T373	0.0957	T374	0.1237
T416	5.3532	T377	11.84					T361	0.8095	T377	11.7805	T374	0.0848	T377	0.1052	T382	0.1861
T417	3.235	T374	7.4176					T365	0.0746	T374	6.36675	T382	0.1072	T374	0.0824	T379	0.1335
T418	3.8719	T382	7.3983					T357	0.6602	T382	15.8424	T379	0.0883	T382	0.0867	T370	0.0691
T419	5.5772	T379	14.9761					T380	0.3539	T379	9.4941	T370	0.1155	T379	0.1011	T371	0.0895
T420	4.2676	T370	9.4188					T385	0.0753	T370	14.6124	T371	0.0926	T370	0.0981	T380	0.1513
T422	4.6922	T371	8.2102					T386	0.078	T371	5.4323	T380	0.0833	T371	0.1034	T385	0.1576
T423	4.9836	T380	12.0265					T375	0.3093	T380	9.72915	T385	0.1126	T380	0.0919	T386	0.0894
T424	4.3348	T385	14.5878					T392	0.9866	T385	8.73015	T386	0.1056	T385	0.118	T375	0.2005
T425	4.3091	T386	8.5966					T369	0.1151	T386	11.0517	T375	0.0953	T386	0.1434	T392	0.0686
T426	3.2266	T375	9.3218					T372	0.3019	T375	11.1207	T392	0.0866	T375	0.1041	T369	0.0885
T427	4.708	T392	8.5495					T389	0.1518	T392	17.9449	T369	0.073	T392	0.0966	T372	0.1273
T428	4.5705	T369	7.1745					T387	0.1985	T369	16.2764	T372	0.1058	T369	0.1007	T389	0.143
T429	3.7492	T372	9.2548					T384	0.4265	T372	14.3916	T389	0.0982	T372	0.0869	T387	0.1512
T430	3.8399	T389	15.1419					T376	0.5458	T389	10.2952	T387	0.1178	T389	0.0951	T384	0.1054
T431	4.0186	T387	9.2447					T390	0.3545	T387	16.1499	T384	0.0931	T387	0.1028	T376	0.1376
T432	4.9048	T384	9.2447					T394	1.428	T384	16.1499	T376	0.0595	T384	0.1061	T390	0.1499
T433	4.8482	T376	17.2318					T388	0.2915	T376	6.8415	T390	0.0922	T376	0.0992	T394	0.0683
T434	4.1047	T390	10.3528					T395	0.1438	T390	11.8076	T394	0.0898	T390	0.0658	T388	0.151
T435	4.2027	T394	9.6726					T393	0.8777	T394	14.9101	T388	0.1013	T394	0.1275	T395	0.1624
T436	3.7287	T388	9.675					T396	0.9403	T388	13.7991	T395	0.0674	T388	0.0937	T393	0.0848
T437	4.2863	T395	15.6798					T397	0.2419	T395	5.78505	T393	0.1244	T395	0.0866	T396	0.1255
T438	4.0176	T393	11.892					T398	0.5261	T393	14.252	T396	0.0739	T393	0.0919	T397	0.1096
T440	5.3124	T396	16.4136					T391	0.2413	T396	9.91995	T397	0.0957	T396	0.1157	T398	0.1141
T441	4.0206	T397	9.6798					T381	0.4674	T397	13.3875	T398	0.0778	T397	0.0808	T391	0.1376
T443	4.0033	T398	9.6381					T407	0.0886	T398	12.6984	T391	0.1123	T398	0.0919	T381	0.0991
T444	4.6182	T391	11.66					T405	0.4851	T391	11.2873	T381	0.0802	T391	0.0937	T407	0.0927
		T381	11.9552					T413	0.8476	T381	15.117	T407	0.0948	T381	0.0962	T405	0.1275
		T407	17.0779					T408	0.8721	T407	9.35325	T405	0.0862	T407	0.0901	T413	0.0406
		T405	14.8702					T412	1.0469	T405	11.319	T413	0.0824	T405	0.081	T408	0.2751
		T413	8.7201					T411	0.7293	T413	16.112	T408	0.0845	T413	0.1191	T412	0.4036
		T408	13.7897					T406	0.4826	T408	11.6598	T412	0.0937	T408	0.1067	T411	0.1104
		T412	7.141					T409	0.4343	T412	18.3225	T411	0.1002	T412	0.1084	T406	0.2196
		T411	12.9974					T415	1.1283	T411	10.5465	T406	0.0741	T411	0.0997	T409	0.4125
		T406	7.6858					T414	1.0496	T406	10.551	T409	0.1239	T406	0.098	T415	0.2575
		T409	13.3348					T410	0.0611	T409	10.6297	T415	0.0883	T409	0.1101	T414	0.1232
		T415	12.6196					T403	0.8644	T415	12.4703	T414	0.1029	T415	0.1136	T410	0.1518
		T414	14.7569					T416	0.0802	T414	11.8195	T410	0.0935	T414	0.0901	T403	0.3315
		T410	15.4147					T399	0.1539	T410	11.1321	T403	0.1274	T410	0.1045	T416	0.358
		T403	16.1559					T402	0.768	T403	5.2545	T416	0.103	T403	0.1039	T399	0.2647
		T416	16.0258					T401	0.0647	T416	8.40195	T399	0.092	T416	0.1219	T402	0.128
		T399	14.74					T400	0.8389	T399	13.3887	T402	0.111	T399	0.1168	T401	0.2402
		T402	13.3675					T404	0.8019	T402	12.1662	T401	0.0798	T402	0.0942	T400	0.0424
		T401	14.822					T424	0.4641	T401	10.2739	T400	0.1012	T401	0.118	T404	0.2179
		T400	14.8364					T418	0.3207	T400	9.8061	T404	0.0869	T400	0.1142	T424	0.2979
		T404	13.7156					T419	0.0763	T404	15.0929	T424	0.0904	T404	0.1063	T418	0.0757
		T424	9.6906					T417	0.4652	T424	14.026	T418	0.0975	T424	0.0834	T419	0.1835
		T418	12.7559					T426	0.2769	T418	13.5951	T419	0.0954	T418	0.1107	T417	0.1496
		T419	13.615					T422	0.1876	T419	11.8697	T417	0.0712	T419	0.1229	T426	0.133
		T417	7.252					T423	0.8065	T417	17.0833	T426	0.0906	T417	0.0697	T422	0.0472
		T426	13.1895					T427	0.4959	T426	12.8967	T422	0.0948	T426	0.0891	T423	0.3798
		T422	10.4176					T425	0.5315	T422	12.4524	T423	0.0974	T422	0.1127	T427	0.2304
		T423	14.5523							T423	12.2328	T427	0.0827	T423	0.0734	T425	0.0622
		T427	12.6932							T427	11.7828	T425	0.1058	T427	0.1003	T420	0.1711
		T425	12.0179							T425	11.3523	T420	0.1121	T425	0.1075	T428	0.1763
		T420	9.3658							T420	12.5949	T428	0.0964	T420	0.0978	T443	0.0673
		T428	11.91							T428	9.9792	T443	0.0948	T428	0.0979	T444	0.2899
		T443	8.6672							T443	18.0576	T444	0.0727	T443	0.0918	T440	0.1831
		T444	17.0092							T444	2.0037	T440	0.1058	T444	0.1036	T437	0.0967
		T440	10.4858							T440	13.6583	T437	0.1144	T440	0.1101	T429	0.1399
		T437	12.9076							T437	16.9855	T429	0.0877	T437	0.095	T432	0.144
		T429	13.1246							T429	12.0219	T432	0.0885	T429	0.1053	T430	0.1008
		T432	13.028							T432	9.0417	T430	0.0887	T432	0.0998	T436	0.1865
		T430	11.6517							T430	15.6969	T436	0.1083	T430	0.1073	T438	0.0473
		T436	7.5187							T436	15.7234	T438	0.0817	T436	0.1077	T435	0.1818
		T438	15.8294							T438	10.6039	T435	0.0884	T438	0.0944	T434	0.1144
		T435	8.2868							T435	19.7727	T434	0.0966	T435	0.0778	T431	0.1695
		T434	12.8806							T434	16.7288	T431	0.076	T434	0.0838	T433	0.1731
		T431	12.9094							T431	13.7675	T433	0.0591	T431	0.0884	T441	0.4247
		T433	9.6258							T433	16.5534	T441	0.0875	T433	0.0919
		T441	10.2765							T441	12.0132			T441	0.0747

## Sheet: 3 sesquiterpene
accession	β-guaiene /%	accession	Caryophyllene/%	accession	γ-elenene/%
T01	0.0041	T01	0.0122	T01	0.0566
T103	0.0075	T10	0.037	T107	0.8759
T121	0.0049	T101	0.0072	T138	0.4596
T123	0.0075	T102	0.0186	T75	0.1021
T19	0.0062	T103	0.0454	T78	0.0061
T44	0.009	T104	0.0494	T84	0.2169
T58	0.0146	T106	0.0216	T91	0.015
		T107	0.0148
		T108	0.0354
		T109	0.0095
		T11	0.0368
		T110	0.0499
		T111	0.0162
		T112	0.0076
		T113	0.0382
		T114	0.0135
		T115	0.011
		T117	0.0587
		T118	0.0669
		T119	0.038
		T12	0.0333
		T120	0.0983
		T121	0.0372
		T122	0.0348
		T123	0.0191
		T124	0.056
		T125	0.056
		T126	0.0682
		T127	0.0505
		T128	0.0601
		T129	0.0085
		T13	0.0354
		T130	0.0406
		T131	0.0337
		T133	0.0099
		T135	0.0114
		T136	0.013
		T137	0.0182
		T138	0.0271
		T14	0.0055
		T140	0.0267
		T142	0.0166
		T143	0.049
		T144	0.056
		T145	0.0375
		T146	0.0269
		T147	0.0176
		T148	0.0805
		T149	0.0353
		T15	0.0448
		T150	0.0479
		T16	0.0315
		T17	0.0247
		T18	0.1386
		T19	0.0279
		T2	0.0416
		T22	0.0222
		T23	0.0436
		T24	0.0247
		T25	0.0097
		T26	0.0321
		T27	0.0058
		T29	0.0269
		T3	0.0109
		T31	0.0217
		T32	0.0168
		T33	0.0177
		T35	0.0627
		T36	0.0097
		T37	0.048
		T38	0.0262
		T39	0.0176
		T4	0.0269
		T40	0.0079
		T41	0.027
		T42	0.0066
		T43	0.0381
		T44	0.0137
		T45	0.0306
		T46	0.0232
		T47	0.1079
		T48	0.0077
		T49	0.0122
		T50	0.054
		T51	0.031
		T52	0.0589
		T53	0.1628
		T54	0.0318
		T55	0.0262
		T56	0.0639
		T57	0.0459
		T58	0.1069
		T59	0.0288
		T6	0.0188
		T61	0.0485
		T63	0.0272
		T64	0.0367
		T65	0.0236
		T66	0.0161
		T67	0.0486
		T68	0.0076
		T69	0.024
		T70	0.0074
		T71	0.0168
		T72	0.0101
		T74	0.0277
		T75	0.0057
		T76	0.0324
		T77	0.0297
		T78	0.0364
		T79	0.0547
		T8	0.0246
		T80	0.0297
		T81	0.0083
		T83	0.007
		T84	0.0593
		T85	0.0251
		T86	0.0284
		T88	0.0612
		T89	0.0509
		T9	0.0138
		T90	0.0204
		T91	0.0253
		T93	0.0162
		T94	0.009
		T95	0.087
		T96	0.0329
		T97	0.0143
		T98	0.0424
		T99	0.0165
		T317	0.0632
		T318	0.0463
		T320	0.0364
		T321	0.0737
		T322	0.1504
		T323	0.0391
		T324	0.0348
		T325	0.0404
		T326	0.0339
		T327	0.0414
		T328	0.0398
		T330	0.0513
		T331	0.0726
		T332	0.0416
		T333	0.0673
		T334	0.0519
		T335	0.0395
		T336	0.0793
		T337	0.0531
		T338	0.0532
		T339	0.0517
		T340	0.0597
		T341	0.0506
		T342	0.0423
		T343	0.0424
		T344	0.041
		T346	0.063
		T347	0.0624
		T348	0.0418
		T349	0.057
		T350	0.0233
		T351	0.0359
		T352	0.046
		T353	0.0578
		T354	0.0542
		T355	0.0416
		T356	0.0886
		T357	0.0463
		T358	0.0406
		T359	0.0407
		T360	0.0571
		T361	0.0915
		T362	0.0438
		T363	0.0615
		T364	0.063
		T365	0.0401
		T366	0.0718
		T367	0.0422

## Sheet: 18 diterpene
accession	8,12-abietadienoic acid	accession	8,13(15)-abietadienoic acid	accession	8,15-pimarene/%	accession	abietic acid/%	accession	atis-15-ene	accession	communic acid/%	accession	dehydroabietinal	accession	Dihydropalustric acid	accession	Isopimaradiene	accession	isopimarene	accession	isopimaric acid	accession	kaurene	accession	levopimaric acid	accession	neoabietic acid	accession	Palustric acid	accession	pimaradiene	accession	pimaric cid	accession	sandaracopimaric acid
T101	0.0026	T10	1.1972	T10	0.085	T01	3.5377	T30	0.0034	T30	0.0034	T01	8.5419	T10	0.319	T10	0.085	T01	0.1351	T01	10.2247	T01	0.1079	T01	18.8302	T10	1.9475	T01	0.9383	T01	0.9312	T01	6.9202	T01	7.0299
T111	0.0881	T100	16.308	T100	0.0549	T02	4.1491	T41	0.0045	T41	0.0045	T10	9.1236	T100	0.7761	T100	0.0549	T104	0.0795	T10	0.0318	T10	0.0464	T02	23.3496	T107	0.4604	T10	0.2035	T10	0.7976	T10	3.5533	T108	3.655
T113	0.1607	T101	0.7281	T102	0.0835	T04	5.6737	T42	0.0031	T42	0.0031	T100	5.672	T105	0.2391	T102	0.0835	T105	0.1238	T100	0.2111	T106	0.0305	T04	16.8577	T108	13.3371	T103	1.0062	T102	1.4013	T100	0.8501	T109	7.834
T115	0.0451	T102	13.2816	T103	0.1331	T08	6.2152	T64	0.0049	T64	0.0049	T101	8.2527	T106	0.3448	T103	0.1331	T106	0.0803	T101	0.3738	T114	0.047	T08	21.162	T109	16.5361	T105	5.4188	T103	1.1431	T101	2.8246	T11	8.3194
T117	0.1087	T103	12.1725	T108	0.1292	T100	8.4333	T98	0.0043	T98	0.0043	T102	7.2085	T107	0.5847	T108	0.1292	T110	0.1098	T102	14.7075	T120	0.0222	T100	22.224	T110	0.9853	T106	0.1869	T104	0.4868	T102	5.0818	T110	6.5958
T119	0.1129	T104	1.7707	T109	0.0447	T101	8.1801			T308	2.5278	T103	6.8221	T108	0.3578	T109	0.0447	T111	0.1065	T103	14.9471	T122	0.0322	T101	28.5817	T111	1.4463	T107	0.276	T105	1.0701	T103	2.5124	T111	7.8581
T124	0.1087	T105	12.1292	T11	0.0745	T104	6.8003			T302	2.5782	T104	6.0884	T11	0.4907	T11	0.0745	T113	0.0813	T104	0.0589	T13	0.043	T104	18.9653	T112	0.4888	T108	6.7737	T106	0.7276	T104	2.2303	T112	7.4056
T125	0.1087	T106	0.8032	T112	0.087	T106	5.3866			T309	3.6412	T105	4.567	T113	0.4719	T112	0.087	T114	0.1022	T105	11.0085	T130	0.0274	T106	16.8818	T113	1.3584	T111	0.1862	T108	1.2582	T105	9.0189	T113	6.6367
T126	0.0174	T108	12.3514	T116	0.0953	T112	10.4858			T306	2.9315	T106	6.2966	T117	0.5147	T116	0.0953	T117	0.1306	T106	0.4149	T141	0.03	T112	15.6739	T114	0.6085	T116	0.0216	T11	0.9188	T106	2.2177	T114	5.8156
T130	0.0159	T109	16.5361	T119	0.1086	T116	6.9819			T301	3.5539	T107	9.1617	T119	0.5398	T119	0.1086	T118	0.1017	T107	9.0473	T149	0.0336	T116	22.6728	T120	0.554	T123	3.8019	T111	0.9125	T107	1.4564	T115	5.5806
T132	0.1346	T110	0.6747	T12	0.0804	T120	6.2568			T303	5.6466	T108	6.7644	T120	0.7399	T12	0.0804	T123	0.0886	T108	0.0696	T150	0.0352	T120	14.5275	T121	0.6021	T130	0.2164	T112	1.132	T108	6.7803	T116	6.8516
T137	0.0778	T111	0.7172	T120	0.0733	T121	5.3537			T310	3.1093	T109	7.3473	T122	0.4337	T120	0.0733	T124	0.0728	T109	30.0507	T2	0.0397	T121	21.3	T122	14.4545	T137	0.0995	T117	0.5244	T109	1.0485	T117	8.2051
T139	0.0363	T113	1.271	T121	0.116	T124	3.7861			T312	2.5514	T11	9.7012	T123	0.3041	T121	0.116	T125	0.0728	T11	0.2369	T21	0.028	T124	19.5038	T123	12.1068	T21	0.1902	T119	0.5895	T11	2.1941	T118	6.6483
T146	0.0266	T114	0.3157	T122	0.0764	T126	6.2983			T304	3.131	T110	7.2608	T124	0.4153	T122	0.0764	T127	0.0734	T110	18.1746	T22	0.0505	T126	21.8376	T124	1.5856	T38	0.0878	T122	0.3896	T110	1.0909	T119	7.5076
T19	0.0328	T115	0.5002	T126	0.1048	T127	6.1041			T305	3.9043	T111	6.15	T125	0.4153	T126	0.1048	T13	0.0821	T111	15.7545	T26	0.0441	T127	17.3219	T125	1.5856	T74	2.6143	T123	0.863	T111	2.8157	T13	7.2229
T22	0.0926	T116	0.6052	T128	0.0647	T128	6.6862			T311	4.2965	T112	5.4346	T126	0.4279	T128	0.0647	T132	0.0624	T112	0.4764	T3	0.0452	T128	17.2575	T126	1.3911	T76	0.2773	T124	1.1545	T112	1.3308	T130	8.3442
T23	0.0268	T117	0.9023	T129	0.0647	T13	9.1112			T307	1.3927	T113	6.641	T127	0.366	T129	0.0647	T133	0.0801	T113	0.4572	T31	0.0049	T13	15.0163	T127	1.6001	T78	3.3739	T125	1.1545	T113	2.0816	T131	7.8756
T24	0.024	T118	12.7238	T130	0.055	T131	6.406			T316	3.0119	T114	6.7702	T134	0.7277	T130	0.055	T134	0.0631	T114	0.271	T32	0.0503	T131	18.8122	T128	1.1067	T83	0.2999	T126	0.9289	T114	1.5966	T132	8.6222
T27	0.0142	T119	0.5784	T131	0.0537	T133	10.9012			T315	1.9904	T115	9.6784	T135	0.6824	T131	0.0537	T136	0.0833	T115	24.6991	T37	0.0418	T133	24.4515	T129	1.2195	T84	0.2152	T127	0.8654	T115	2.1368	T133	6.4211
T3	0.0444	T12	9.9502	T137	0.0833	T134	11.8464			T317	3.1994	T116	7.6063	T137	0.3631	T137	0.0833	T139	0.0454	T116	16.1859	T38	0.0336	T134	25.2148	T13	1.0177	T86	4.1873	T128	0.9976	T116	0.7898	T134	8.0448
T30	0.0254	T120	0.554	T138	0.0512	T140	9.3212			T314	4.1458	T117	7.4723	T14	0.5678	T138	0.0512	T14	0.0631	T117	0.0285	T39	0.0285	T140	17.509	T130	0.2712	T88	4.0548	T13	0.8877	T117	2.4272	T135	5.4147
T31	0.0684	T121	0.2178	T140	0.0375	T142	4.8455			T313	4.0625	T118	7.1201	T146	0.5122	T140	0.0375	T143	0.0799	T118	16.6687	T40	0.0421	T142	17.4623	T131	0.9944	T89	4.1853	T132	0.6357	T118	2.0284	T136	6.1421
T32	0.1419	T122	14.4545	T141	0.0716	T146	3.9803			T318	3.2936	T119	6.1125	T148	0.5036	T141	0.0716	T145	0.069	T119	17.9553	T41	0.0456	T146	20.5087	T132	0.8927	T9	0.4106	T134	0.0386	T119	1.6515	T137	4.7352
T34	0.0889	T123	12.1068	T142	0.0898	T15	3.5966			T328	2.1389	T12	9.8622	T149	0.6812	T142	0.0898	T146	0.0866	T12	17.0428	T45	0.0295	T15	21.8362	T133	14.3902	T93	0.0255	T137	1.5658	T12	2.975	T138	7.1657
T35	0.1162	T124	0.6625	T144	0.1209	T151	3.1203			T323	3.5463	T120	6.1694	T15	0.6003	T144	0.1209	T147	0.0901	T120	18.2727	T47	0.0355	T151	19.92	T134	12.9627	T94	0.0242	T139	0.014	T120	1.8326	T139	5.2776
T4	0.042	T125	0.6625	T148	0.0736	T152	3.316			T326	3.237	T121	6.0928	T150	0.4573	T148	0.0736	T149	0.063	T121	0.1144	T5	0.0472	T152	23.8687	T135	12.6909			T146	0.623	T121	2.3064	T149	7.901
T40	0.0195	T126	1.3911	T15	0.0609	T154	4.4274			T350	3.224	T122	6.9968	T16	0.3933	T15	0.0609	T17	0.0694	T122	13.4486	T59	0.0381	T154	16.929	T136	0.7118			T148	1.2337	T122	1.9712	T15	8.4755
T42	0.0877	T127	1.6001	T150	0.0609	T158	4.9874			T320	3.1849	T123	6.3392	T17	0.5498	T150	0.0609	T18	0.0811	T124	0.0915	T62	0.0561	T158	27.828	T138	0.1096			T150	0.4892	T123	2.2048	T150	7.0769
T43	0.0232	T128	0.6385	T20	0.0655	T159	4.619			T321	3.3602	T124	6.8627	T18	0.4158	T20	0.0655	T19	0.1136	T125	0.0915	T65	0.0422	T159	16.2862	T139	12.7023			T16	0.9492	T124	2.0025	T16	9.4129
T44	0.0859	T129	0.7466	T21	0.0583	T160	4.5306			T324	2.8834	T125	6.8627	T19	0.4337	T21	0.0583	T2	0.0813	T126	16.0753	T7	0.0017	T160	20.724	T14	0.4785			T17	1.1822	T125	2.0025	T17	9.1437
T45	0.0178	T13	0.2034	T22	0.1102	T162	4.2153			T342	3.3314	T126	5.9321	T20	0.4533	T22	0.1102	T23	0.0505	T127	15.0492	T76	0.0664	T162	14.46	T140	13.762			T18	0.3255	T126	1.6043	T18	7.6128
T49	0.0241	T130	0.1829	T26	0.0838	T163	3.0052			T343	4.1398	T127	6.8131	T22	0.371	T26	0.0838	T24	0.0518	T128	16.8882	T79	0.0411	T163	18.6232	T141	13.7205			T19	0.0288	T127	1.6884	T19	7.184
T5	0.0292	T131	0.9944	T27	0.067	T164	5.3062			T347	4.4704	T128	5.867	T23	0.3972	T27	0.067	T25	0.1178	T129	0.0768	T8	0.0374	T164	15.8103	T142	0.5242			T2	0.9919	T128	1.4399	T2	7.372
T50	0.1141	T132	0.5911	T28	0.0743	T167	9.4592			T351	3.791	T129	6.0861	T24	0.3886	T28	0.0743	T29	0.0565	T13	14.659	T80	0.0484	T167	20.5575	T143	0.5733			T20	0.4633	T129	2.2165	T20	8.88
T52	0.0243	T133	14.3781	T31	0.1141	T168	7.0062			T346	3.791	T13	7.7826	T25	0.5932	T31	0.1141	T3	0.0843	T130	17.0681	T94	0.0293	T168	17.2812	T144	14.7833			T22	1.0479	T13	3.7012	T21	6.4147
T58	0.0227	T134	12.9627	T34	0.0807	T17	18.3717			T327	3.6909	T130	5.3705	T26	0.4504	T34	0.0807	T30	0.0788	T131	14.9389	T96	0.0499	T17	18.4609	T145	0.9345			T23	0.8182	T130	1.0935	T22	7.5153
T64	0.1296	T135	12.6909	T35	0.0738	T173	8.3008			T348	2.9813	T131	5.0102	T27	0.5877	T35	0.0738	T32	0.065	T143	14.5011			T173	24.684	T146	13.7648			T25	1.2466	T131	0.9443	T23	6.5958
T65	0.048	T136	0.2256	T38	0.0843	T177	3.902			T344	3.1059	T132	5.0743	T28	0.3792	T38	0.0843	T36	0.0899	T144	15.6835			T177	19.6725	T147	0.3613			T26	0.6823	T132	2.2946	T24	8.0894
T66	0.1014	T138	0.1096	T40	0.0649	T18	12.3667			T330	3.7564	T133	5.698	T3	0.5292	T40	0.0649	T37	0.1535	T145	0.4281			T18	17.0989	T148	1.0609			T28	0.5845	T133	1.3405	T25	8.6824
T71	0.1122	T139	12.7023	T43	0.1005	T181	4.5496			T337	3.5472	T134	5.6413	T31	0.4587	T43	0.1005	T39	0.0641	T146	0.6621			T181	15.5437	T149	0.8115			T30	1.3274	T134	0.9208	T26	8.381
T72	0.1073	T14	0.4785	T44	0.0884	T188	4.1054			T338	2.1396	T135	6.2806	T33	0.4424	T44	0.0884	T4	0.0734	T147	17.5597			T188	17.685	T15	1.2762			T31	1.349	T135	4.678	T27	5.8125
T75	0.0418	T140	13.4167	T46	0.0943	T227	5.9427			T334	4.0928	T136	6.3724	T34	0.4872	T46	0.0943	T41	0.1173	T148	0.0896			T227	21.0036	T150	0.6169			T34	0.5985	T136	1.9776	T28	6.751
T78	0.0165	T141	13.7205	T47	0.0685	T23	5.4295			T336	3.3841	T137	6.3851	T35	0.6692	T47	0.0685	T42	0.0814	T149	17.7518			T23	24.3525	T17	11.5893			T36	0.025	T137	7.1745	T29	8.5352
T8	0.0212	T142	0.5242	T48	0.0553	T230	4.1746			T341	1.1745	T150	6.0593	T36	0.6726	T48	0.0553	T45	0.0592	T15	29.9314			T230	21.591	T18	13.4395			T37	1.0075	T138	2.4737	T3	8.3259
T81	0.124	T143	0.5733	T5	0.0722	T260	3.5635			T331	2.2523	T16	6.8621	T37	0.4856	T5	0.0722	T49	0.078	T150	0.3506			T260	22.5562	T19	13.9818			T40	0.5634	T139	5.5384	T30	9.6636
T85	0.1246	T144	14.234	T50	0.0732	T33	2.3451			T340	3.9347	T17	10.5249	T38	0.554	T50	0.0732	T53	0.1068	T16	0.1467			T33	18.345	T2	0.8407			T41	0.5659	T14	0.1448	T31	7.8137
T87	0.1231	T145	0.3152	T51	0.0555	T34	3.0469			T341	4.7548	T18	8.1319	T4	0.5465	T51	0.0555	T58	0.0901	T17	15.1151			T34	11.1788	T21	0.1953			T42	1.2644	T140	6.4293	T32	12.1282
T88	0.0172	T146	13.7648	T52	0.0932	T35	3.1108			T342	3.2747	T19	8.4247	T40	0.4471	T52	0.0932	T59	0.098	T18	0.0754			T35	23.2943	T22	12.858			T46	1.122	T141	1.4349	T33	5.9318
T91	0.0197	T147	0.3613	T54	0.0563	T36	3.0231			T343	3.7982	T2	7.7328	T41	0.4715	T54	0.0563	T63	0.0794	T19	16.6863			T36	17.4465	T23	12.5701			T48	0.5363	T142	2.952	T34	6.2537
T94	0.0259	T148	1.0609	T55	0.0979	T42	3.354			T344	4.1453	T20	8.6427	T42	0.4772	T55	0.0979	T65	0.1086	T2	14.8693			T42	23.94	T25	15.7223			T49	0.5124	T143	2.1296	T35	8.966
T97	0.1178	T149	0.8115	T56	0.0882	T44	3.0141			T346	2.0963	T21	10.1234	T43	0.6394	T56	0.0882	T66	0.0707	T21	13.8599			T44	23.4413	T26	0.7752			T5	0.0222	T144	1.9154	T36	7.0815
		T15	1.1383	T6	0.056	T47	3.4753			T347	2.7703	T22	8.4216	T46	0.4199	T6	0.056	T7	0.0719	T22	0.312			T47	19.71	T28	11.7589			T50	0.6784	T145	2.0514	T37	6.3378
		T150	0.6169	T60	0.0741	T51	9.4456			T348	5.1181	T23	10.5455	T49	0.462	T60	0.0741	T71	0.0744	T23	13.3048			T51	22.437	T29	14.8827			T52	1.207	T146	2.3298	T38	7.6733
		T17	11.5893	T62	0.0936	T53	5.0234			T349	3.1975	T24	9.0754	T5	0.554	T62	0.0936	T72	0.0653	T24	0.2586			T53	16.9116	T3	0.478			T53	1.8901	T147	2.1039	T39	9.1312
		T18	13.2414	T67	0.0803	T54	5.0234			T350	3.4401	T25	6.0212	T51	0.4872	T67	0.0803	T75	0.0883	T25	0.211			T54	16.9116	T30	0.829			T55	1.0918	T148	2.4362	T4	8.6208
		T19	13.4614	T69	0.0495	T55	5.2892			T351	3.682	T26	6.4401	T52	0.5113	T69	0.0495	T76	0.1034	T26	0.2737			T55	20.6685	T31	13.1053			T58	0.501	T149	2.1354	T40	10.9212
		T21	0.1953	T70	0.0823	T56	6.0898			T352	2.081	T34	8.9222	T53	0.4454	T70	0.0823	T78	0.1069	T27	14.5096			T56	23.9378	T32	11.0698			T60	1.2429	T15	1.0406	T41	7.0363
		T22	12.0369	T73	0.1373	T59	4.4482			T353	3.4504	T35	6.7209	T54	0.6676	T73	0.1373	T79	0.1013	T28	21.7131			T59	15.0457	T33	14.0756			T61	1.4687	T150	2.1055	T42	6.9138
		T23	11.9008	T74	0.0826	T62	3.7107			T354	3.3351	T36	7.2715	T55	0.6483	T74	0.0826	T8	0.0948	T29	14.3584			T62	17.2845	T34	1.2035			T64	0.4875	T16	2.5555	T43	6.3349
		T25	15.2005	T77	0.0643	T63	3.1723			T366	3.6161	T37	6.6611	T57	0.5267	T77	0.0643	T82	0.0651	T3	14.8379			T63	12.7425	T35	0.4271			T65	0.0031	T17	1.0058	T44	7.2448
		T26	0.4977	T80	0.1075	T66	2.7723			T367	3.1409	T38	6.8547	T59	0.4655	T80	0.1075	T84	0.0911	T30	0.4265			T66	11.7863	T36	0.6229			T66	0.5301	T18	2.9258	T45	9.9547
		T28	11.138	T81	0.0899	T67	3.1054			T368	4.0029	T39	9.7955	T6	0.5938	T81	0.0899	T86	0.1265	T31	0.165			T67	18.4477	T37	0.9367			T71	0.6112	T19	2.8108	T46	9.6792
		T29	14.8827	T83	0.0741	T68	2.7351			T369	3.2957	T4	8.166	T61	0.6502	T83	0.0741	T88	0.1783	T32	10.6481			T68	13.6837	T38	0.7276			T72	1.2374	T2	3.422	T47	6.9234
		T3	0.478	T85	0.0559	T72	2.6646			T370	4.44	T40	7.9024	T63	0.67	T85	0.0559	T89	0.0659	T33	0.1136			T72	19.32	T39	0.7359			T73	0.0696	T20	2.1876	T48	9.0652
		T30	0.1096	T87	0.1013	T74	2.758			T371	2.6211	T41	8.3144	T65	0.4618	T87	0.1013	T90	0.0785	T34	0.279			T74	17.466	T4	0.4801			T74	0.8885	T21	2.7524	T49	8.4202
		T31	13.1053	T9	0.0983	T76	2.9007			T372	3.207	T42	6.9967	T67	0.6522	T9	0.0983	T91	0.0597	T35	14.3574			T76	15.12	T40	0.8524			T75	0.9822	T22	4.8238	T5	6.9591
		T32	11.0698	T92	0.0745	T77	5.1709			T373	4.1774	T43	8.1487	T7	0.4071	T92	0.0745	T93	0.0796	T48	14.4155			T77	19.6599	T41	13.0054			T77	1.0093	T23	2.7296	T50	7.5332
		T33	13.6367	T95	0.097	T78	3.3987			T374	3.2529	T44	8.6546	T73	0.467	T95	0.097	T94	0.043	T49	15.7054			T78	22.3042	T42	0.4626			T78	1.417	T24	3.0639	T51	8.5292
		T34	0.8574	T98	0.1422	T79	3.5173			T375	3.2742	T45	6.3091	T74	0.4145	T98	0.1422	T96	0.1485	T5	13.0924			T79	24.3228	T43	13.4184			T79	0.5072	T25	1.8514	T52	6.6745
		T36	0.6229	T99	0.1305	T81	2.3651			T376	4.0058	T46	5.7943	T75	0.4403	T99	0.1305	T354	0.1826	T50	0.2848			T81	20.5224	T44	0.5049			T8	0.5132	T26	1.7312	T53	7.743
		T38	0.7276			T82	3.259			T377	4.2826	T47	6.3802	T78	0.3173			T366	0.1264	T51	14.1798			T82	16.8788	T45	0.899			T80	1.0306	T27	2.6092	T54	8.0877
		T39	0.7359			T83	3.5423			T378	3.2035	T48	7.2739	T8	0.3653			T367	0.1523	T52	17.3182			T83	23.2808	T46	14.4484			T81	1.0156	T28	1.673	T55	7.8525
		T4	0.3724			T84	3.8186			T379	2.7015	T49	6.8342	T80	0.635			T368	0.1858	T62	14.376			T84	22.485	T47	14.3762			T82	0.0349	T29	2.2677	T56	7.3986
		T40	0.8524			T85	3.5673			T380	5.4836	T5	9.2678	T81	0.4539			T369	0.0827	T63	14.5324			T85	23.895	T48	12.7658			T83	1.2264	T3	1.1728	T57	5.3521
		T41	12.6332			T86	2.5099			T381	4.4607	T50	8.4089	T83	0.4093			T370	0.1957	T64	0.4802			T86	17.46	T49	1.5633			T85	0.53	T30	2.0404	T58	6.7673
		T42	0.4626			T87	2.9164			T382	3.858	T51	7.4923	T85	0.5729			T371	0.1045	T65	15.3512			T87	11.4488	T5	0.2681			T86	1.446	T31	1.8569	T59	6.8204
		T43	13.4184			T91	2.7307			T384	2.8805	T52	6.9574	T89	0.3383			T372	0.1073	T66	0.1024			T91	15.3315	T50	0.3565			T87	1.9551	T32	0.7859	T6	7.0967
		T44	0.5049			T93	3.3026			T385	3.6987	T53	8.0839	T98	0.7549			T373	0.1737	T67	16.2476			T93	20.2297	T51	0.3657			T88	1.2623	T33	2.4126	T60	8.0265
		T45	0.899			T97	3.1542			T386	3.3571	T54	6.0276					T374	0.061	T68	16.6055			T97	20.0475	T52	1.1088			T90	0.4055	T34	1.4806	T61	7.7019
		T46	14.4484			T98	2.8834			T390	2.2034	T55	7.0733					T375	0.1555	T69	0.1325			T98	15.2167	T53	2.2227			T92	1.3417	T35	2.5671	T62	6.9833
		T47	14.3762			T99	3.1021			T393	3.1423	T56	7.03					T376	0.1339	T7	13.8753			T99	17.487	T54	0.6349			T96	0.581	T36	1.6581	T63	6.6857
		T48	12.7658			T308	10.1277			T394	4.1493	T57	6.5161					T377	0.1061	T70	16.4707			T308	25.241	T55	0.5396			T97	0.0065	T37	2.8782	T64	6.548
		T49	0.6691			T302	10.6378			T395	3.6873	T58	7.0189					T378	0.1175	T72	0.4274			T302	20.9931	T56	0.6848			T98	1.3319	T38	2.1217	T65	7.6809
		T5	0.2681			T309	11.9629			T396	3.6543	T59	6.5158					T379	0.0974	T73	0.2765			T309	22.4798	T57	1.3664			T99	1.3351	T39	2.4075	T66	7.7921
		T50	0.3565			T306	10.9781			T397	2.7961	T6	7.0869					T380	0.1268	T75	15.6349			T306	24.2165	T58	1.057			T315	1.2717	T4	1.3926	T67	6.7093
		T52	1.1088			T301	8.8479			T398	2.6062	T60	6.3977					T381	0.1031	T76	25.5113			T301	16.3395	T59	1.0856			T317	0.9195	T40	2.7501	T68	5.872
		T53	1.6224			T303	10.6439			T399	4.1818	T61	5.9587					T382	0.2596	T77	0.0778			T303	24.0024	T6	1.1965			T314	1.2791	T41	2.9258	T69	8.8286
		T54	0.6349			T310	10.1951			T400	4.1782	T62	7.3609					T384	0.1485	T78	0.0821			T310	23.2201	T60	0.6425			T313	0.9044	T42	1.4373	T7	9.8889
		T55	0.5396			T312	9.1237			T401	3.0271	T63	7.8778					T385	0.1001	T79	15.8843			T312	25.4616	T61	0.4859			T318	1.1251	T43	2.3262	T70	7.5841
		T56	0.6848			T304	11.474			T402	3.6708	T64	9.227					T386	0.1404	T8	15.8561			T304	19.8046	T62	0.406			T328	1.3807	T44	3.0959	T71	8.2749
		T57	1.3664			T305	8.9662			T403	3.8011	T65	8.0854					T390	0.1072	T80	0.1934			T305	25.934	T63	0.4067			T323	1.2375	T45	1.6221	T72	8.9047
		T58	1.057			T311	10.7748			T404	2.4963	T66	8.4093					T393	0.0753	T81	16.677			T311	22.7665	T64	0.3049			T326	0.5828	T46	2.0586	T73	7.5955
		T59	1.0856			T307	10.1277			T405	3.1753	T67	7.2932					T394	0.0844	T82	31.7828			T307	25.241	T65	15.6194			T350	0.6399	T47	2.1615	T74	6.2695
		T6	1.1965			T316	10.0926			T406	2.742	T68	9.3443					T395	0.1566	T83	10.8836			T316	24.6731	T66	14.1306			T320	0.609	T48	2.0447	T75	6.0777
		T60	0.6425			T315	10.9789			T407	2.4924	T69	7.6095					T396	0.2701	T84	15.5114			T315	23.6678	T67	0.452			T321	0.8055	T49	3.3336	T76	5.9891
		T61	0.4859			T317	10.5021			T408	3.9489	T7	6.5903					T397	0.0926	T85	0.0718			T317	21.6826	T68	0.5799			T324	1.0848	T5	0.8037	T77	7.0579
		T62	0.406			T314	9.3654			T409	3.6138	T70	7.412					T398	0.1639	T86	9.594			T314	20.9115	T70	0.6899			T342	0.9526	T50	2.9144	T78	3.3748
		T63	0.4067			T313	9.7871			T410	1.894	T71	6.7178					T399	0.0917	T87	13.3438			T313	24.9332	T71	1.5731			T343	0.9441	T51	2.808	T79	6.8569
		T64	0.3049			T318	9.6129			T411	2.2798	T72	6.4996					T400	0.0951	T88	11.286			T318	24.79	T72	0.7542			T347	0.5788	T52	1.9123	T8	7.2537
		T65	15.3637			T328	9.421			T412	5.3968	T73	6.2375					T401	0.0888	T89	9.2075			T328	21.9114	T73	1.8868			T351	1.0222	T53	1.821	T80	8.3665
		T66	14.1306			T323	10.1293			T413	3.3906	T74	6.5975					T402	0.1917	T9	0.1078			T323	23.802	T74	2.9484			T346	0.5468	T54	1.1208	T81	7.4344
		T67	0.4104			T326	8.5805			T414	3.5004	T75	6.7558					T403	0.123	T90	0.7617			T326	24.458	T75	2.2786			T327	0.3191	T55	1.3635	T82	8.0056
		T68	0.5799			T350	7.7029			T415	3.3955	T76	7.4205					T404	0.1252	T91	22.833			T350	21.2046	T76	1.5803			T348	0.6104	T56	1.9364	T83	6.8787
		T69	0.4024			T320	9.2387			T420	3.8677	T77	6.0677					T405	0.1969	T92	0.1686			T320	22.9919	T82	0.411			T344	0.8192	T57	3.7099	T84	2.0766
		T7	0.5057			T321	9.6586			T422	4.78	T78	6.0651					T406	0.1022	T93	14.2226			T321	22.3548	T83	1.446			T330	1.875	T58	3.0667	T85	6.2204
		T70	0.6899			T324	10.451			T423	4.9752	T79	6.3568					T407	0.0739	T94	0.7871			T324	24.029	T84	13.951			T337	0.1816	T59	1.9122	T86	3.0139
		T71	1.5731			T342	8.5118			T424	1.6957	T8	7.8013					T408	0.1092	T95	16.7474			T342	25.6095	T89	0.9568			T338	1.1994	T6	1.9542	T87	7.5465
		T72	0.7542			T343	8.8531			T425	6.2502	T80	5.9297					T409	0.2097	T96	0.0676			T343	24.9357	T9	8.7198			T334	0.5976	T60	2.4239	T88	6.7583
		T73	1.8868			T347	8.6636			T426	5.8195	T81	6.0781					T410	0.1276	T97	12.945			T347	25.6389	T90	15.0921			T336	1.3487	T61	2.1154	T89	6.3111
		T74	2.9484			T351	10.6043			T427	3.2813	T82	6.5368					T411	0.1226	T98	16.5585			T351	22.0983	T91	1.4509			T341	0.8703	T62	2.8397	T9	5.8202
		T75	1.5474			T346	8.2763			T428	3.7384	T83	7.9477					T412	0.1266	T99	0.4402			T346	21.1815	T92	15.7486			T331	1.1347	T63	2.989	T90	8.3314
		T76	1.5803			T327	10.8026			T429	5.5891	T84	8.3105					T413	0.1613	T308	0.1022			T327	25.3901	T93	0.7064			T340	1.0549	T64	2.9943	T91	7.2166
		T77	17.4256			T348	11.4366			T430	2.7411	T85	6.9307					T414	0.1088	T302	0.0892			T348	20.1226	T94	1.064			T339	0.8884	T65	1.9586	T92	8.6333
		T79	15.0045			T344	9.5516			T431	3.0239	T86	6.135					T415	0.1703	T309	0.1456			T344	23.6231	T95	12.6567			T335	0.9456	T66	1.9894	T93	8.0344
		T80	0.6899			T330	10.0464			T432	2.8351	T87	6.285					T420	0.1192	T306	0.1292			T330	24.0279	T96	2.1339			T332	1.1143	T67	0.2925	T94	9.3315
		T81	1.7428			T337	9.594			T433	3.2035	T88	7.1136					T422	0.1834	T301	0.1812			T337	21.9524	T97	0.6923			T349	1.1307	T68	1.9172	T95	8.1395
		T82	0.2012			T338	9.5085			T434	4.2061	T89	6.8744					T423	0.1204	T303	0.061			T338	23.9982	T98	1.0367			T300	1.1224	T69	2.7524	T96	7.3013
		T83	1.3349			T334	10.8109			T435	2.4692	T9	15.0877					T424	0.1098	T310	11.2769			T334	23.7238	T99	0.7253			T333	0.7981	T7	0.9355	T97	7.0279
		T84	13.0253			T336	10.1259			T436	2.2378	T90	6.6544					T425	0.1094	T312	0.2629			T336	21.7308	T308	17.7881			T325	1.9466	T70	2.3828	T98	8.0492
		T85	0.6191			T341	9.3029			T437	3.3127	T91	8.1975					T426	0.097	T304	0.1079			T341	25.3597	T302	16.0591			T322	1.5281	T71	4.3796	T99	9.0313
		T87	16.7867			T331	9.996			T438	2.4859	T92	5.9701					T427	0.1505	T305	0.1573			T331	22.8492	T309	13.1812			T367	1.4776	T72	3.6815	T308	9.0121
		T89	0.9568			T340	8.1863			T440	3.6391	T93	6.7671					T428	0.1572	T311	0.0391			T340	20.8512	T306	13.8032			T363	0.8095	T73	2.3899	T302	8.2003
		T9	8.7198			T339	9.996			T441	3.6016	T94	6.5158					T429	0.1303	T307	0.0582			T339	22.8492	T301	15.2908			T353	0.9165	T74	2.8761	T309	10.6082
		T90	15.0921			T335	10.3244					T95	6.5279					T430	0.1	T316	0.1124			T335	21.5332	T303	15.5614			T364	0.8187	T75	1.6301	T306	7.3114
		T91	1.3862			T332	10.4363					T96	6.602					T431	0.1429	T315	14.0458			T332	21.7858	T310	14.2161			T366	1.2453	T76	3.9255	T301	8.9746
		T92	15.0983			T349	10.3501					T97	7.601					T432	0.1582	T317	0.1292			T349	23.1842	T312	14.5618			T368	1.3074	T77	1.4659	T303	9.6668
		T93	0.7064			T300	10.9114					T98	5.6456					T433	0.1088	T314	27.4686			T300	16.4154	T304	0.0584			T354	0.5278	T78	5.8589	T310	7.1328
		T94	1.064			T333	9.4182					T99	7.3056					T434	0.1502	T313	0.0627			T333	25.4803	T305	14.686			T352	1.477	T79	2.6792	T312	9.4635
		T95	12.4393			T325	9.7631					T312	4.6113					T435	0.1736	T318	0.1038			T325	20.1422	T311	14.7269			T355	0.901	T8	2.455	T304	5.8567
		T96	2.1339			T322	10.5007					T304	5.0782					T436	0.1145	T328	28.8912			T322	23.2426	T307	15.1508			T360	1.0544	T80	0.6021	T305	5.9077
		T98	1.0367			T367	8.2137					T305	4.4702					T437	0.102	T323	0.127			T367	22.0045	T316	16.2543			T361	1.2328	T81	2.794	T311	8.2638
		T99	0.7253			T363	9.658					T311	7.8223					T438	0.0942	T326	0.2229			T363	21.0928	T315	17.7786			T365	0.7229	T82	1.3441	T307	9.894
		T336	17.7881			T353	8.829					T307	6.1946					T440	0.119	T350	0.0523			T353	25.1095	T317	15.9943			T357	0.5003	T83	2.1603	T316	9.9703
		T337	16.0591			T364	9.8361					T316	6.2913					T441	0.1698	T320	16.2885			T364	24.9787	T314	14.5676			T359	0.3512	T84	5.6077	T315	10.254
		T338	13.1812			T366	10.942					T315	5.8904							T321	0.0561			T366	22.4177	T313	15.0234			T356	0.8189	T85	1.1133	T317	9.6111
		T339	13.8032			T368	10.5045					T317	6.205							T324	0.0565			T368	22.7809	T318	15.4844			T358	1.11	T86	7.1408	T314	7.4462
		T340	15.2908			T354	8.6809					T314	5.5279							T342	0.125			T354	22.7067	T328	14.9864			T362	0.1857	T87	1.4957	T313	7.0084
		T341	15.5614			T352	8.999					T313	8.5341							T343	0.1914			T352	18.2883	T323	15.5366			T378	1.7368	T88	2.5485	T318	12.2197
		T342	14.2161			T355	9.1223					T318	6.0469							T347	0.1915			T355	23.6538	T326	14.7132			T373	1.3737	T89	3.808	T328	12.8937
		T343	14.5618			T360	9.3589					T328	6.2081							T351	28.8038			T360	23.8829	T350	14.8226			T377	0.8202	T9	1.1261	T323	7.689
		T344	0.0584			T361	11.045					T323	5.9016							T346	0.0542			T361	23.9431	T320	16.8163			T374	0.8967	T90	4.2018	T326	12.6978
		T346	14.686			T365	10.629					T326	5.8178							T327	0.1118			T365	23.7791	T321	16.3994			T382	0.3293	T91	1.8146	T350	8.8847
		T347	14.7269			T357	8.4747					T350	7.1109							T348	28.4498			T357	22.2342	T324	16.5173			T379	0.6339	T92	1.8184	T320	10.6006
		T348	15.1508			T359	10.6043					T320	6.6253							T344	30.4191			T359	22.0983	T342	16.9006			T370	0.8902	T93	1.4185	T321	8.984
		T349	16.2543			T356	9.5268					T321	6.444							T330	9.4677			T356	25.3744	T343	15.3609			T371	0.7353	T94	0.7092	T300	11.9249
		T350	17.7786			T358	8.5522					T324	7.6564							T337	0.1311			T358	19.3012	T347	15.7081			T380	0.2991	T95	1.9922	T333	8.5497
		T351	15.9943			T362	10.6631					T342	7.4604							T338	0.0613			T362	23.6385	T351	18.967			T385	0.7802	T96	1.7018	T325	7.7718
		T352	14.5676			T378	10.7481					T343	5.5277							T334	26.9321			T378	23.4679	T346	14.4018			T386	0.5709	T97	2.4093	T322	5.3771
		T353	15.0234			T373	9.5324					T347	5.308							T336	0.1869			T373	23.8382	T327	0.6123			T375	0.7268	T98	0.9813	T367	10.4558
		T354	15.4844			T377	11.5707					T351	6.8854							T341	17.682			T377	21.3778	T348	15.5901			T392	1.1126	T99	3.2731	T363	7.2143
		T366	14.9864			T374	9.7623					T346	5.9853							T331	0.131			T374	19.1694	T344	14.2548			T369	0.7133			T353	6.2706
		T367	15.5366			T382	7.5571					T327	5.8923							T340	20.3747			T382	22.315	T330	15.8747			T372	1.257			T364	8.6265
		T368	14.7132			T379	10.506					T348	7.4368							T339	0.1111			T379	24.6159	T337	14.7562			T389	0.8055			T366	10.9102
		T369	14.8226			T370	9.0786					T344	8.1257							T335	0.1683			T370	21.2177	T338	14.7874			T387	1.1943			T368	9.8232
		T370	16.8163			T371	8.6553					T330	6.0491							T332	0.0482			T371	21.7575	T334	14.8945			T384	0.6861			T354	9.9883
		T371	16.3994			T380	11.4869					T337	5.7723							T349	0.1091			T380	22.2548	T336	14.1942			T376	1.187			T352	8.0002
		T372	16.5173			T385	9.8576					T338	5.6499							T300	0.1954			T385	23.1981	T341	15.6207			T390	0.9068			T355	10.1359
		T373	16.9006			T386	10.0433					T334	6.7026							T333	0.1971			T386	21.5757	T331	14.3764			T394	1.0478			T360	11.4438
		T374	15.3609			T375	10.2592					T336	5.9659							T325	0.2254			T375	15.8308	T340	0.6552			T388	1.0563			T361	9.0221
		T375	15.7081			T392	8.7692					T341	6.0494							T322	0.5063			T392	23.7313	T339	16.7952			T395	0.9081			T365	7.8971
		T376	18.967			T369	9.4106					T331	6.6091							T367	0.0644			T369	22.2156	T335	16.2345			T393	1.2619			T357	7.0904
		T377	14.4018			T372	10.5408					T340	5.5633							T363	0.1571			T372	20.8923	T332	3.9722			T396	0.7491			T359	9.9553
		T378	0.6123			T389	9.6962					T339	5.288							T353	0.1466			T389	23.4265	T349	16.307			T397	0.7088			T356	9.1907
		T379	15.5901			T387	10.1977					T335	6.3666							T364	27.3823			T387	21.4405	T300	16.7287			T398	0.9592			T358	6.9306
		T380	14.2548			T384	10.1977					T332	5.7885							T366	0.268			T384	22.0952	T333	16.212			T391	0.8687			T362	11.2918
		T381	15.8747			T376	10.6915					T349	5.3768							T368	18.0419			T376	23.8557	T325	14.2186			T381	1.3605			T378	9.19
		T382	14.7562			T390	9.4327					T300	6.5592							T354	28.8055			T390	22.4761	T322	15.8291			T407	0.6047			T373	8.786
		T384	14.7874			T394	10.6394					T333	5.7862							T352	0.0526			T394	22.7719	T367	17.4826			T405	0.3653			T377	11.307
		T385	14.8945			T388	9.4218					T325	5.9611							T355	0.0541			T388	24.0271	T363	16.1478			T413	1.2351			T374	7.8927
		T386	14.1942			T395	9.5434					T322	5.4696							T360	0.1013			T395	24.6235	T353	14.564			T408	0.9616			T382	8.3111
		T390	15.6207			T393	10.3663					T367	7.1473							T361	0.0548			T393	21.8902	T364	14.4228			T412	1.0104			T379	7.4311
		T391	14.3764			T396	10.6481					T363	6.8486							T365	33.3415			T396	24.6102	T366	15.1779			T411	0.8722			T376	8.2868
		T392	0.6552			T397	10.5729					T353	7.0488							T357	0.0459			T397	22.947	T368	13.9772			T406	0.0677			T390	8.7437
		T393	16.7952			T398	10.7445					T364	5.6716							T359	0.0941			T398	24.5511	T354	14.0142			T409	0.06			T394	9.6982
		T394	16.2345			T391	10.0057					T366	5.5551							T356	27.7785			T391	20.8429	T352	14.832			T415	1.0497			T388	8.7315
		T395	3.9722			T381	11.2172					T368	5.6727							T358	0.0491			T381	21.9565	T355	13.6669							T395	10.4116
		T396	16.307			T407	9.1416					T354	7.3624							T362	0.0473			T407	24.3056	T360	17.5606							T393	9.3506
		T397	16.7287			T405	10.0954					T352	5.2877							T378	0.1798			T405	23.3966	T361	15.2524							T396	8.8552
		T398	16.212			T413	9.887					T355	4.7416							T373	0.1927			T413	21.0134	T365	16.4411							T397	11.2849
		T399	14.2186			T408	9.3769					T360	6.4982							T377	0.2809			T408	23.4363	T357	15.4042							T398	7.3232
		T400	15.8291			T412	9.4008					T361	5.1947							T374	0.2353			T412	25.8256	T359	11.1042							T391	11.0182
		T401	17.4826			T411	11.4416					T365	7.1776							T382	0.0632			T411	23.3106	T356	14.9339							T381	9.0997
		T402	16.1478			T406	11.0989					T357	6.6876							T379	18.6669			T406	24.6345	T358	13.9323							T407	11.2824
		T403	14.564			T409	10.2267					T359	6.8801							T370	28.9629			T409	23.6089	T362	15.3899							T405	11.7211
		T404	14.4228			T415	9.1345					T356	6.1356							T371	25.2751			T415	24.9708	T378	15.6753							T413	9.3628
		T405	15.1779			T414	8.9081					T358	6.5501							T380	0.1059			T414	21.0919	T373	13.9802							T408	11.0518
		T406	13.9772			T410	10.3142					T362	6.0565							T385	0.1574			T410	25.2528	T377	14.2095							T412	10.8386
		T407	14.0142			T403	10.7359					T378	5.1721							T386	0.1972			T403	25.1668	T374	15.3549							T411	12.1066
		T408	14.832			T416	10.3898					T373	6.2387							T375	0.102			T416	21.1473	T382	17.8766							T406	8.103
		T409	13.6669			T399	11.4024					T377	8.7357							T392	0.1701			T399	23.8738	T379	14.7497							T409	11.9888
		T410	17.5606			T402	10.007					T374	5.5678							T369	0.0976			T402	23.5492	T370	18.0455							T415	9.1483
		T411	15.2524			T401	8.4157					T382	6.0423							T372	28.6059			T401	25.2098	T371	17.218							T414	9.0398
		T412	16.4411			T400	12.0811					T375	6.0402							T389	0.1472			T400	24.7579	T380	14.584							T410	10.125
		T413	15.4042			T404	10.1029					T392	5.936							T387	0.1848			T404	24.4302	T385	13.9841							T403	9.2734
		T414	11.1042			T424	12.215					T411	7.1427							T384	18.4462			T424	22.1233	T386	14.6119							T416	6.3341
		T415	14.9339			T418	10.263					T412	5.2111							T376	0.2702			T418	23.2019	T375	15.0007							T399	7.908
		T420	13.9323			T419	10.4881					T413	7.3235							T390	0.1338			T419	22.224	T392	15.6762							T402	12.6092
		T422	15.3899			T417	9.3228					T414	7.0379							T394	0.2428			T417	24.9635	T369	17.509							T401	8.2079
		T423	15.6753			T426	10.2319					T415	4.9706							T388	0.1258			T426	22.7602	T372	12.7861							T400	5.5919
		T424	13.9802			T422	10.1734					T420	6.0165							T395	0.0341			T422	21.5399	T389	14.1729							T404	8.5857
		T425	14.2095			T423	10.2455					T422	4.5255							T393	20.7503			T423	21.4187	T387	16.3713							T424	10.2698
		T426	15.3549			T427	9.7022					T423	6.4847							T396	0.1864			T427	23.4695	T384	14.3177							T418	11.7947
		T427	17.8766			T425	12.1576					T424	5.2757							T397	0.1528			T425	24.6408	T376	17.8852							T419	11.082
		T428	14.7497			T420	8.6268					T425	4.5642							T398	0.1394			T420	26.0368	T390	16.1081							T417	8.9108
		T429	18.0455			T428	9.1554					T426	5.7625							T391	0.1585			T428	25.2848	T394	15.2469							T426	8.8013
		T430	17.218			T443	8.7072					T427	5.4707							T381	0.2513			T443	24.1438	T388	15.0112							T422	8.4446
		T431	14.584			T444	11.897					T428	6.0008							T407	0.2603			T444	23.1492	T395	5.8327							T423	8.091
		T432	13.9841			T440	13.0708					T429	10.7744							T405	20.4064			T440	22.4731	T393	2.3828							T427	6.5845
		T433	14.6119			T437	9.7863					T430	5.5818							T413	8.3594			T437	22.04	T396	14.9887							T425	8.7687
		T434	15.0007			T429	9.7891					T431	5.2228							T408	0.1429			T429	22.8284	T397	15.3557							T420	8.7783
		T435	15.6762			T432	10.4772					T432	7.3346							T412	0.1928			T432	24.8953	T398	13.1756							T428	7.065
		T436	17.509			T430	10.999					T433	5.9937							T411	0.0727			T430	23.3231	T391	16.6366							T436	8.0465
		T437	12.7861			T436	9.8815					T434	5.4584							T406	0.1371			T436	23.5975	T381	14.6562							T438	5.8885
		T438	14.1729			T438	7.5769					T435	6.1541							T409	0.1791			T438	23.9912	T407	4.4914							T435	8.8124
		T440	16.3713			T435	7.7821					T436	6.6965							T415	0.1085			T435	23.2718	T405	14.4505							T434	10.968
		T441	14.3177			T434	11.302					T437	6.1735							T414	0.0491			T434	24.7468	T413	16.1856							T431	11.3811
						T431	10.3882					T438	6.8199							T410	0.1225			T431	21.8502	T408	16.4345							T433	8.8022
						T433	9.8499					T440	6.9652											T433	24.0845	T412	16.0023							T441	8.8311
						T441	10.7982					T441	5.3097											T441	22.6988	T411	16.8922
